# Supplementary material
Source: PubMed Central journal article supplement (PMC3084497)
Supplement: NIHMS285419-supplement-01.pdf [file NIHMS285419-supplement-01.pdf]

**Appendix (to be published only online)**

**Weight, fitness, glycemic control, blood pressure and lipids for Diabetes Support and Education (DSE) and Intensive Lifestyle Intervention (ILI) at baseline and changes from baseline at years 1 – 4**

| Measure                                   | DSE<br>Mean (CI)         | ILI<br>Mean (CI)         | p-value |
|-------------------------------------------|--------------------------|--------------------------|---------|
| <b>Weight Loss (% of initial weight)</b>  |                          |                          |         |
| Baseline                                  | 100.8±18.8               | 100.5±19.6               |         |
| Year 1 - baseline                         | - 0.63 (-0.86, -0.40)    | - 8.53 (-8.76, -8.30)    | <.0001  |
| Year 2 – baseline                         | - 0.92 (-1.19, -0.65)    | - 6.33 (-6.59, -6.06)    | <.0001  |
| Year 3 – baseline                         | - 0.90 (-1.20, -0.61)    | - 5.08 (-5.38, -4.79)    | <.0001  |
| Year 4 - baseline                         | - 1.06 (-1.38, -0.75)    | - 4.66 (-4.97, -4.35)    | <.0001  |
| <b>Percent change in fitness (% METS)</b> |                          |                          |         |
| Baseline                                  | 5.1±1.5                  | 5.2±1.5                  |         |
| Year 1– baseline                          | 4.99 [3.95,6.02]         | 20.37 [19.36, 21.37]     | <.0001  |
| Year 4– baseline                          | - 1.07 [-2.14, 0.00]     | 5.11 [4.07,6.16]         | <.0001  |
| <b>HbA1c</b>                              |                          |                          |         |
| Baseline                                  | 7.31 ± 0.02              | 7.25 ± 0.02              | NS      |
| Year 1– baseline                          | - 0.12 (-0.15, -0.08)    | - 0.64 (-0.67, -0.60)    | <.0001  |
| Year 2– baseline                          | - 0.08 (-0.13, -0.04)    | - 0.37 (-0.41, -0.32)    | <.0001  |
| Year 3– baseline                          | - 0.09 (-0.14, -0.04)    | - 0.26 (-0.30, -0.21)    | <.0001  |
| Year 4– baseline                          | - 0.07 (-0.13, -0.02)    | - 0.19 (-0.24, -0.14)    | 0.0014  |
| <b>SBP (mmHg)</b>                         |                          |                          |         |
| Baseline                                  | 129.49 ±0.34             | 128.22 ±0.34             |         |
| Year 1– baseline                          | - 2.32 (-2.91, -1.72)    | - 7.03 (-7.62, -6.44)    | <.0001  |
| Year 2– baseline                          | - 3.06 (-3.69, -2.44)    | - 4.96 (-5.58, -4.34)    | <.0001  |
| Year 3– baseline                          | - 3.12 (-3.79, -2.46)    | - 4.70 (-5.36, -4.04)    | 0.0009  |
| Year 4– baseline                          | - 3.37 (-4.04, -2.69)    | - 4.62 (-5.29, -3.95)    | 0.0101  |
| <b>DBP (mmHg)</b>                         |                          |                          |         |
| Baseline                                  | 70.37 ± 0.19             | 69.93 ± 0.19             |         |
| Year 1– baseline                          | - 1.64 (-1.94, -1.33)    | - 3.07 (-3.37, -2.77)    | <.0001  |
| Year 2– baseline                          | - 2.18 (-2.50, -1.86)    | - 2.69 (-3.01, -2.37)    | 0.0275  |
| Year 3– baseline                          | - 2.71 (-3.04, -2.38)    | - 2.76 (-3.08, -2.43)    | 0.8305  |
| Year 4– baseline                          | - 3.41 (-3.75, -3.08)    | - 3.16 (-3.49, -2.83)    | 0.2868  |
| <b>HDL Cholesterol (mg/dl)</b>            |                          |                          |         |
| Baseline                                  | 43.48 ± 0.24             | 43.48 ± 0.24             |         |
| Year 1– baseline                          | 1.35 (1.07, 1.62)        | 3.37 (3.10, 3.65)        | <.0001  |
| Year 2– baseline                          | 1.93 (1.62, 2.23)        | 3.78 (3.48, 4.09)        | <.0001  |
| Year 3– baseline                          | 2.04 (1.72, 2.36)        | 3.58 (3.26, 3.90)        | <.0001  |
| Year 4– baseline                          | 2.58 (2.25, 2.91)        | 3.95 (3.62, 4.28)        | <.0001  |
| <b>Triglyceride (mg/dl)</b>               |                          |                          |         |
| Baseline                                  | 180.31 ± 2.32            | 183.05 ± 2.30            |         |
| Year 1– baseline                          | - 15.18 (-18.68, -11.68) | - 29.29 (-32.77, -25.80) | <.0001  |
| Year 2– baseline                          | - 17.28 (-20.88, -13.69) | - 24.68 (-28.24, -21.12) | 0.0041  |
| Year 3– baseline                          | - 19.40 (-22.98, -15.82) | - 25.48 (-29.04, -21.93) | 0.0181  |

|                                                             |                          |                          |        |
|-------------------------------------------------------------|--------------------------|--------------------------|--------|
| Year 4– baseline                                            | - 27.14 (-30.70, -23.58) | - 22.79 (-26.31, -19.27) | 0.0883 |
| <b>LDL Cholesterol (mg/dl)</b>                              |                          |                          |        |
| Baseline                                                    | 112.26 ± 0.65            | 112.37 ± 0.64            |        |
| Year 1– baseline                                            | - 5.50 (-6.55, -4.46)    | - 5.11 (-6.16, -4.07)    | 0.6046 |
| Year 2– baseline                                            | - 11.10 (-12.27, -9.93)  | - 9.43 (-10.60, -8.27)   | 0.0480 |
| Year 3– baseline                                            | - 16.00 (-17.18, -14.82) | - 13.88 (-15.06, -12.71) | 0.0127 |
| Year 4– baseline                                            | - 18.75 (-19.94, -17.55) | - 16.64 (-17.82, -15.46) | 0.0140 |
| <b>LDL Cholesterol (mg/dl) Adjusting for Medication Use</b> |                          |                          |        |
| Baseline                                                    | 112.26 ± 0.65            | 112.37 ± 0.64            |        |
| Year 1– baseline                                            | - 3.70 (-4.76, -2.65)    | - 4.44 (-5.49, -3.39)    | 0.3301 |
| Year 2– baseline                                            | - 7.62 (-8.75, -6.49)    | - 7.47 (-8.58, -6.35)    | 0.8544 |
| Year 3– baseline                                            | - 12.02 (-13.15, -10.90) | - 10.64 (-11.75, -9.53)  | 0.0829 |
| Year 4– baseline                                            | - 13.52 (-14.66, -12.38) | - 12.45 (-13.58, -11.32) | 0.1854 |
